# Supplementary material for: Accuracy of Expected Symptoms and Subsequent Quality of Life Measures Among Adults With COPD
Source: PubMed Central journal article supplement (PMC10663971; doi:10.1001/jamanetworkopen.2023.44030), 2023-11-21
Supplement: jamanetwopen-e2344030-s002.pdf [file jamanetwopen-e2344030-s002.pdf]

## Data Sharing Statement

### Data

**Data available:** No

### Additional Information

**Explanation for why data not available:** We will work with individual investigators requesting a copy of the data to ensure compliance with the IRB-approved study protocol given the limitations on data sharing included in the consent provided by patient participants. Please email [joanna.hart@pennmedicine.edu](mailto:joanna.hart@pennmedicine.edu) to coordinate data sharing.
